# Supplementary material
Source: PubMed Central journal article supplement (PMC4356192)
Supplement: Supp_Data.pdf [file Supp_Data.pdf]

## Supplementary Data

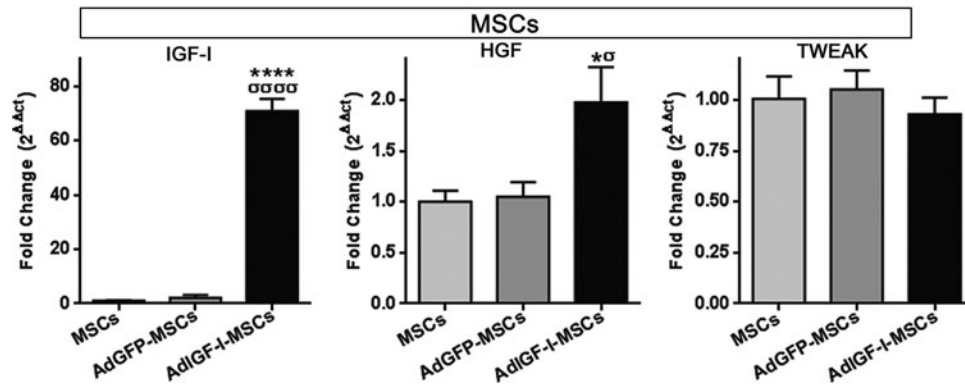

**SUPPLEMENTARY FIG. S1.** Expression profile of naïve and transduced MSCs. Quantitative graphs showing mRNA expression levels of IGF-I, HGF and TWEAK in naïve (*light gray bars*) and AdGFP-MSCs (*gray bars*) or AdIGF-I-MSCs (*black bars*) transduced MSCs. \* $\sigma P < 0.05$  versus AdGFP-MSCs; \*\*\*\* $\sigma\sigma\sigma\sigma P < 0.0001$  versus DMEM
